# Supplementary material
Source: Springer Nature journal article supplement (https://www.springermedizin.de/resource/supplementary/13058_2006_1722_MOESM2_ESM.pdf/9699774)

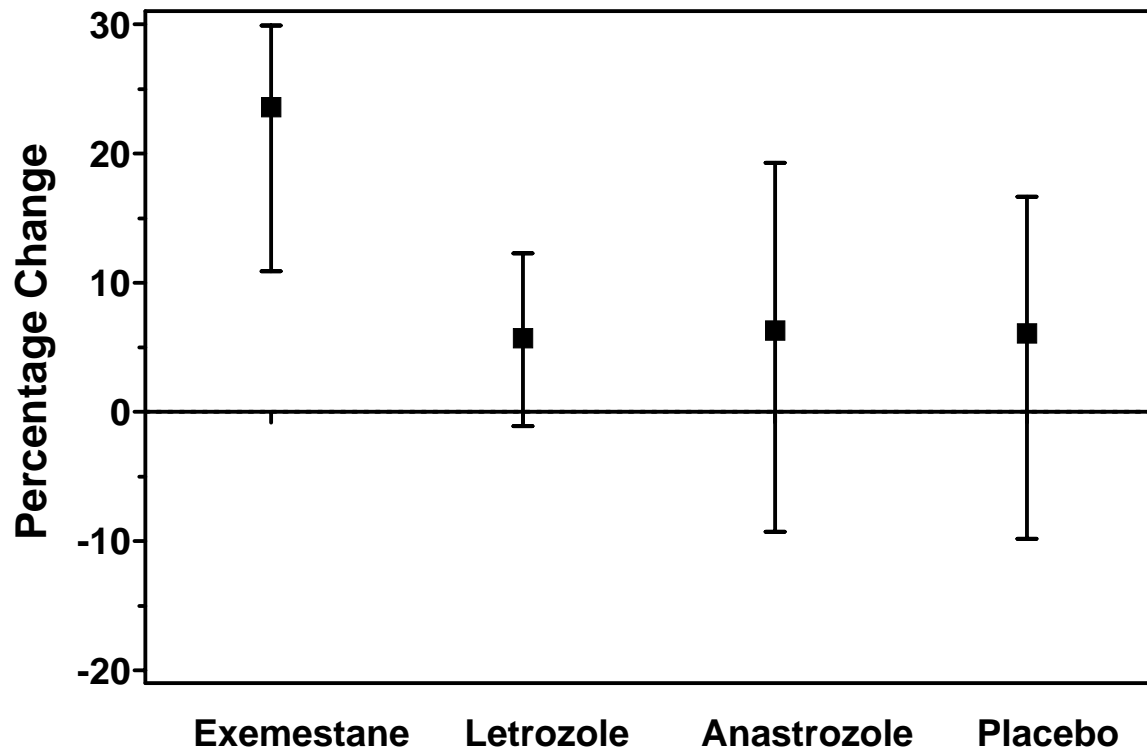

Supplement: MOESM2 [file 9699774]
